# Supplementary material
Source: PubMed Central journal article supplement (PMC3044955)
Supplement: supp_M110.132118_jbc.M110.132118-1.pdf [file supp_M110.132118_jbc.M110.132118-1.pdf]

Supplementary Table 1 (S1a)

Positive immune response against StreptInCor overlapping peptides of patients (N=74 out of 107)

PepVac identification

|    | HLA-DRB1       | NC* cpm | 10          | 15         | 16          | 17          | 18         | 20         | 21         | 38  | 44          | 48          | 51          | 52          | 53          | PC** SI      |
|----|----------------|---------|-------------|------------|-------------|-------------|------------|------------|------------|-----|-------------|-------------|-------------|-------------|-------------|--------------|
| 1  | 7, 13, 53, 52  | 519.6   | <b>8.8</b>  | <b>8.8</b> | <b>9.8</b>  | <b>3.3</b>  | <b>6.5</b> | <b>2.2</b> | 0.9        | nt  | <b>8.8</b>  | <b>3.7</b>  | <b>6.8</b>  | <b>5.8</b>  | <b>7.4</b>  | <b>257.6</b> |
| 2  | 1, 18, 52, 0   | 754.6   | <b>2.7</b>  | <b>2.9</b> | <b>3.6</b>  | 0.5         | <b>2.4</b> | <b>4.5</b> | <b>2.4</b> | 1.8 | <b>2.5</b>  | <b>3.5</b>  | <b>6.1</b>  | 1.1         | <b>2.4</b>  | <b>312.3</b> |
| 3  | 15, 11, 51, 52 | 364.6   | 1.5         | <b>2.0</b> | 1.0         | 1.2         | 0.7        | <b>2.0</b> | <b>2.3</b> | nt  | <b>2.2</b>  | 1.5         | 1.0         | 1.1         | 1.0         | <b>290.4</b> |
| 4  | 7, 10, 53, 0   | 162.0   | <b>2.6</b>  | nt         | 0.6         | nt          | 1.3        | nt         | 0.8        | 0.9 | 1.6         | nt          | nt          | 0.5         | nt          | <b>321.1</b> |
| 5  | 15, 17, 51, 52 | 302.5   | 0.8         | <b>2.1</b> | 0.7         | 1.0         | 0.7        | 1.8        | 0.6        | 1.5 | 1.9         | 1.7         | nt          | 0.4         | <b>4.7</b>  | <b>507.3</b> |
| 6  | 18, 7, 52, 53  | 193.1   | 1.6         | <b>2.1</b> | <b>2.4</b>  | 1.1         | 1.2        | 1.3        | 1.4        | 1.4 | 1.8         | 1.2         | 1.2         | 1.4         | 1.3         | <b>680.7</b> |
| 7  | 4, 7, 53, 0    | 117.9   | 1.1         | <b>2.6</b> | 1.5         | 1.9         | 1.2        | <b>2.2</b> | <b>2.2</b> | nt  | 0.6         | 1.1         | 0.9         | 0.5         | 1.5         | <b>537.9</b> |
| 8  | 16, 17, 51, 52 | 470.3   | 1.4         | <b>3.1</b> | 1.6         | 1.0         | 1.3        | 1.9        | 1.6        | nt  | 0.9         | 1.3         | 1.4         | 0.7         | 1.0         | <b>138.5</b> |
| 9  | 16, 17, 51, 52 | 187.9   | nt          | 1.4        | 11.9        | <b>4.8</b>  | 1.9        | <b>2.3</b> | 0.7        | nt  | nt          | <b>3.8</b>  | nt          | <b>2.1</b>  | <b>4.1</b>  | <b>336.3</b> |
| 10 | 7, 10, 53      | 155.1   | 1.6         | <b>3.4</b> | 1.7         | <b>2.4</b>  | 0.8        | 1.4        | 1.8        | nt  | <b>2.2</b>  | <b>2.2</b>  | <b>2.3</b>  | <b>2.5</b>  | <b>2.7</b>  | <b>491.5</b> |
| 11 | 7, 53, 51      | 221.7   | 1.2         | 1.4        | 1.3         | 1.4         | 1.3        | 1.3        | 1.1        | nt  | <b>2.0</b>  | <b>2.2</b>  | 1.2         | 1.0         | 1.8         | <b>323.7</b> |
| 12 | 15, 16, 51, 0  | 983.0   | 1.2         | 0.7        | 1.3         | 0.4         | 1.4        | 0.6        | <b>2.2</b> | nt  | 1.3         | 0.5         | 0.4         | <b>2.3</b>  | <b>2.4</b>  | <b>76.5</b>  |
| 13 | 7, 13, 52, 53  | 419.1   | 1.1         | <b>4.0</b> | <b>3.6</b>  | <b>3.6</b>  | <b>2.5</b> | <b>3.1</b> | <b>2.7</b> | nt  | 1.1         | 1.2         | 1.3         | 0.7         | 1.3         | <b>138.3</b> |
| 14 | 15, 8, 51, 0   | 124.1   | nt          | 1.0        | nt          | 1.8         | <b>6.9</b> | <b>2.7</b> | nt         | nt  | nt          | 1.2         | 0.8         | 0.7         | 1.6         | <b>535.6</b> |
| 15 | 7, 8, 53, 0    | 301.4   | 1.0         | 1.8        | 0.9         | 1.9         | 0.9        | 1.6        | 0.8        | nt  | <b>2.8</b>  | <b>2.8</b>  | <b>3.3</b>  | <b>4.0</b>  | <b>3.6</b>  | <b>93.5</b>  |
| 16 | 4, 11, 52, 53  | 231.6   | <b>2.2</b>  | 0.9        | 1.5         | 1.2         | 1.9        | <b>2.0</b> | 1.4        | nt  | 1.3         | 0.9         | 0.6         | 1.9         | 1.3         | <b>309.2</b> |
| 17 | 11, 14, 52, 0  | 209.1   | 1.0         | <b>2.7</b> | 1.4         | 1.1         | 1.7        | 1.9        | <b>2.7</b> | nt  | 1.9         | 1.4         | <b>3.1</b>  | <b>2.9</b>  | <b>2.7</b>  | <b>386.1</b> |
| 18 | 4, 7, 53, 0    | 394.4   | 0.4         | <b>2.0</b> | <b>5.4</b>  | <b>5.4</b>  | 1.7        | 1.8        | <b>2.2</b> | nt  | 1.0         | <b>2.5</b>  | <b>2.7</b>  | 0.3         | 1.3         | <b>133.7</b> |
| 19 | 11, 14, 52     | 352.5   | <b>4.5</b>  | <b>2.3</b> | <b>5.1</b>  | <b>3.0</b>  | <b>3.2</b> | <b>5.9</b> | <b>3.9</b> | nt  | <b>5.8</b>  | 1.9         | 1.1         | 1.7         | 0.1         | <b>189.4</b> |
| 20 | 17, 13, 52, 0  | 249.7   | 0.6         | <b>2.2</b> | nt          | <b>2.9</b>  | 1.6        | <b>4.1</b> | 0.8        | nt  | <b>3.1</b>  | 1.8         | 0.5         | 1.4         | <b>2.9</b>  | <b>215.7</b> |
| 21 | 14, 15, 52, 51 | 257.2   | 1.0         | 1.1        | 0.8         | 0.8         | 0.8        | 1.4        | <b>2.0</b> | nt  | <b>2.0</b>  | 1.7         | 1.0         | 1.2         | 0.9         | <b>309.1</b> |
| 22 | 4, 11, 52, 53  | 378.6   | 0.9         | <b>3.7</b> | 1.4         | 0.8         | 1.5        | 0.8        | nt         | 0.9 | <b>2.0</b>  | 0.8         | 1.0         | 0.8         | 0.6         | <b>780.9</b> |
| 23 | 1, 7, 53, 0    | 152.5   | 1.5         | <b>4.2</b> | <b>3.8</b>  | <b>4.9</b>  | <b>2.2</b> | <b>3.6</b> | <b>3.0</b> | nt  | <b>2.8</b>  | <b>3.1</b>  | 0.7         | 0.6         | <b>3.0</b>  | <b>425.3</b> |
| 24 | 16, 18, 51, 52 | 343.5   | 1.0         | <b>2.0</b> | 1.6         | 1.2         | 1.2        | 1.7        | 0.9        | nt  | 1.2         | <b>2.2</b>  | <b>2.8</b>  | 0.8         | <b>2.3</b>  | <b>208.0</b> |
| 25 | 1, 13, 52, 0   | 169.1   | 1.3         | <b>2.2</b> | 1.1         | 1.5         | 1.0        | 1.3        | 1.2        | nt  | 1.3         | 0.7         | 0.8         | 0.5         | 1.0         | <b>354.2</b> |
| 26 | 1, 16, 51, 0   | 155.6   | 1.5         | 1.6        | <b>2.7</b>  | <b>2.1</b>  | 1.3        | <b>2.2</b> | 0.8        | nt  | <b>2.3</b>  | <b>2.7</b>  | <b>2.2</b>  | <b>2.1</b>  | 1.4         | <b>590.1</b> |
| 27 | 7, 4, 53       | 153.7   | 1.0         | 1.7        | 0.8         | 0.4         | 1.5        | 0.6        | <b>2.0</b> | 0.9 | 0.9         | 0.7         | 0.7         | 0.8         | 0.6         | <b>542.0</b> |
| 28 | 11, 13, 52, 0  | 179.9   | 1.1         | 0.8        | 1.3         | 0.9         | 1.4        | <b>2.2</b> | 1.2        | nt  | 1.7         | <b>2.6</b>  | 1.7         | 1.9         | 1.6         | <b>112.8</b> |
| 29 | 15, 11, 51, 52 | 247.1   | 1.2         | <b>2.2</b> | 1.0         | 1.2         | 1.1        | 1.0        | 0.8        | nt  | 0.9         | 1.3         | 1.0         | 0.9         | 0.9         | <b>227.3</b> |
| 30 | 15, 7, 51, 53  | 211.8   | <b>29.2</b> | 11.5       | <b>42.8</b> | <b>27.0</b> | 18.3       | <b>3.2</b> | nt         | nt  | <b>32.1</b> | <b>30.5</b> | <b>26.5</b> | <b>49.4</b> | <b>26.8</b> | <b>322.7</b> |
| 31 | 15, 7, 51, 53  | 395.6   | nt          | 0.3        | nt          | 0.4         | nt         | 0.6        | nt         | 0.4 | nt          | 1.4         | 1.5         | <b>2.6</b>  | 0.3         | <b>283.3</b> |
| 32 | 1, 11, 52, 0   | 199.6   | <b>3.2</b>  | <b>2.5</b> | 1.9         | <b>4.0</b>  | <b>4.5</b> | 1.9        | <b>2.2</b> | nt  | <b>4.3</b>  | <b>6.3</b>  | 1.4         | 1.1         | <b>3.1</b>  | <b>312.3</b> |
| 33 | 1, 7, 0, 53    | 74.9    | nt          | <b>3.0</b> | nt          | 1.0         | nt         | 1.2        | nt         | 1.0 | nt          | 0.9         | 1.7         | nt          | 1.3         | <b>388.5</b> |
| 34 | 7, 17, 52, 53  | 73.2    | 1.8         | <b>2.2</b> | 1.1         | nt          | 1.0        | nt         | 1.0        | 1.0 | nt          | nt          | nt          | 1.5         | nt          | <b>154.6</b> |
| 35 | 8, 13, 52, 0   | 175.1   | 1.2         | 1.1        | 1.3         | 1.2         | <b>2.0</b> | 0.8        | 1.6        | 1.0 | 1.5         | 0.7         | 1.0         | 1.5         | 1.0         | <b>53.7</b>  |
| 36 | 11, 0, 52, 0   | 770.4   | 1.0         | 1.4        | <b>2.0</b>  | 0.6         | <b>2.8</b> | <b>4.2</b> | 1.5        | 1.1 | <b>2.2</b>  | <b>2.7</b>  | 1.2         | 1.5         | <b>2.3</b>  | <b>436.3</b> |

Supplementary Table 1 (S1b)

Positive immune response against StreptInCor overlapping peptides of patients (N=74 out of 107)

PepVac identification

|    | HLA-DRB1       | NC* cpm | 10  | 15  | 16   | 17  | 18  | 20   | 21  | 38  | 44  | 48  | 51  | 52  | 53  | PC** SI |
|----|----------------|---------|-----|-----|------|-----|-----|------|-----|-----|-----|-----|-----|-----|-----|---------|
| 37 | 11, 14, 52, 0  | 158.5   | 1.0 | 2.1 | 1.8  | 1.5 | 1.4 | 1.8  | 1.1 | nt  | 1.9 | nt  | 0.7 | 1.1 | 2.1 | 596.8   |
| 38 | 1, 4, 0, 53, 0 | 157.1   | 0.9 | 2.8 | 2.0  | 2.4 | 1.8 | 1.3  | 2.7 | 1.4 | 2.7 | 2.6 | 2.6 | 3.5 | 3.3 | 593.8   |
| 39 | 7, 15, 51, 53  | 215.4   | 1.9 | 2.2 | 4.6  | 3.2 | 3.0 | 3.2  | 2.6 | nt  | 8.5 | 3.3 | nt  | 2.2 | 3.5 | 203.3   |
| 40 | 11, 7, 52, 53  | 289.5   | 2.1 | 3.3 | nt   | 1.4 | 0.9 | 1.0  | nt  | 0.8 | 0.7 | 4.6 | 2.2 | 0.7 | 2.0 | 426.8   |
| 41 | 16, 4, 51, 53  | 329.4   | 5.3 | 3.5 | 12.5 | 2.6 | 2.6 | 2.3  | 2.2 | nt  | 5.7 | 4.1 | 5.5 | 9.1 | 7.1 | 162.2   |
| 42 | 7, 53          | 440.8   | 0.7 | 1.1 | 2.7  | 1.0 | 0.8 | 1.8  | 0.5 | nt  | 1.2 | 2.2 | 1.8 | 0.8 | 0.9 | 66.2    |
| 43 | 17, 14, 52     | 152.3   | 1.3 | 0.6 | 1.8  | 2.3 | 0.9 | 1.3  | 0.8 | nt  | 2.2 | 1.0 | 4.5 | 1.9 | 2.2 | 964.8   |
| 44 | 11, 4, 52, 53  | 231.3   | nt  | 2.1 | 0.9  | 0.6 | 0.4 | nt   | nt  | 0.9 | 1.2 | 0.8 | 1.3 | 1.0 | 1.2 | 629.8   |
| 45 | 1, 7, 53       | 170.0   | 0.8 | 2.0 | 3.4  | 1.5 | 1.5 | 2.5  | 4.5 | nt  | 1.6 | 2.0 | 1.8 | 2.4 | 4.4 | 147.0   |
| 46 | 13, 4, 52, 53  | 84.4    | nt  | 3.8 | 2.4  | 1.7 | 2.0 | 2.6  | nt  | 1.8 | 2.7 | 2.1 | 2.3 | 2.0 | 2.5 | 2141.7  |
| 47 | 7, 17, 52, 53  | 438.3   | 7.1 | 5.7 | 3.3  | 0.9 | 4.2 | 4.6  | 3.8 | nt  | 3.5 | 1.3 | 1.2 | 3.9 | 4.4 | 189.0   |
| 48 | 13, 7, 52, 53  | 340.5   | 1.6 | 1.6 | 4.1  | 1.5 | 0.8 | 1.1  | 1.2 | nt  | 0.6 | 0.5 | 0.4 | 0.7 | 2.7 | 472.1   |
| 49 | 11, 52         | 176.0   | 1.0 | 3.0 | 1.2  | 1.0 | 0.8 | 1.5  | 0.9 | nt  | 1.1 | 0.8 | 1.1 | 1.1 | nt  | 303.3   |
| 50 | 11, 52         | 100.5   | 0.9 | 2.3 | 0.6  | 0.9 | 1.1 | 2.0  | 1.5 | 1.0 | 0.8 | 0.8 | 0.7 | 1.1 | 0.9 | 919.5   |
| 51 | 1, 7, 53       | 115.9   | 1.1 | 2.4 | 1.3  | 2.0 | 1.1 | 1.6  | 3.2 | 1.5 | 1.1 | 1.6 | 1.1 | 1.3 | 3.2 | 755.5   |
| 52 | 15, 4, 51, 53  | 75.7    | nt  | 1.5 | 2.3  | 1.8 | 1.5 | nt   | nt  | nt  | 2.3 | 1.4 | 1.2 | 1.6 | nt  | 1113.6  |
| 53 | 15, 17, 51, 52 | 285.5   | 1.7 | 4.0 | nt   | 1.2 | 0.8 | 1.0  | 0.9 | nt  | 2.3 | 3.1 | 1.1 | nt  | nt  | 681.4   |
| 54 | 13, 10, 52     | 372.9   | 0.5 | 0.9 | 1.0  | 1.3 | 0.5 | 2.2  | 0.9 | 0.8 | 1.0 | 0.3 | 0.6 | 0.8 | 0.8 | 474.0   |
| 55 | 7, 10, 53      | 355.4   | 2.2 | 1.1 | 1.4  | 0.9 | 1.5 | 1.3  | 1.1 | nt  | 0.8 | 0.9 | 0.8 | 1.0 | 1.1 | 209.9   |
| 56 | 7, 8, 53       | 1213.2  | 1.2 | 2.6 | 2.6  | 2.2 | 1.2 | 1.8  | 1.5 | 0.9 | 0.6 | 1.3 | 2.5 | 0.7 | 0.8 | 157.0   |
| 57 | 14, 7, 52, 53  | 149.8   | 1.0 | 0.7 | 1.3  | 3.1 | 1.0 | 1.3  | 1.1 | nt  | 0.5 | 0.6 | 0.5 | 0.5 | 0.5 | 295.5   |
| 58 | 17, 14, 52     | 157.5   | 0.5 | 3.4 | 1.3  | 0.7 | 1.0 | 1.2  | 0.6 | 1.6 | 1.3 | 1.0 | 4.1 | 1.2 | 1.0 | 1117.7  |
| 59 | 15, 17, 51, 52 | 169.2   | nt  | 3.8 | nt   | 0.7 | 0.9 | nt   | nt  | 0.7 | nt  | 1.5 | 0.9 | 0.5 | 0.7 | 190.0   |
| 60 | 11, 14, 52     | 119.6   | 1.6 | 1.2 | 0.6  | 1.0 | 1.1 | 2.2  | 1.7 | nt  | 1.7 | 1.3 | 1.2 | 1.4 | 1.4 | 407.4   |
| 61 | 1, 1, 13, 52   | 222.8   | 0.6 | 0.9 | 1.4  | 1.0 | 1.0 | 1.1  | 1.5 | nt  | 3.4 | 2.9 | 0.6 | 0.7 | 2.0 | 457.0   |
| 62 | 4, 8, 53       | 69.5    | 0.9 | 1.5 | 2.6  | 1.2 | 1.2 | 4.1  | 1.9 | nt  | 1.2 | 1.2 | 2.3 | 1.9 | 2.6 | 736.6   |
| 63 | 1, 7, 53       | 135.4   | 1.2 | 9.3 | 2.1  | 1.4 | 1.4 | 0.4  | nt  | 0.8 | 1.4 | 1.1 | 1.2 | 1.1 | 1.0 | 578.6   |
| 64 | 15, 4, 51, 53  | 254.1   | 1.6 | 0.5 | 0.8  | 0.5 | 0.6 | 1.6  | 2.1 | nt  | 0.7 | 0.6 | 0.5 | 0.6 | 0.7 | 513.7   |
| 65 | 11, 7, 52, 53  | 115.3   | 0.8 | 3.3 | 1.6  | 0.7 | 1.3 | 1.4  | 0.9 | 1.0 | 1.7 | 1.0 | 1.1 | 0.9 | 1.3 | 1322.8  |
| 66 | 1, 8           | 145.2   | 1.0 | 2.4 | 1.4  | 2.3 | 1.0 | 1.6  | 4.6 | 3.7 | 1.0 | 1.3 | 1.1 | 1.1 | 6.2 | 684.4   |
| 67 | 4, 11, 52, 53  | 149.2   | 1.3 | 2.0 | 1.2  | 2.0 | 3.1 | 1.5  | 0.9 | 2.6 | 1.8 | 3.8 | 1.2 | 0.9 | 2.2 | 882.0   |
| 68 | 11, 8, 52      | 246.6   | 0.8 | 2.1 | 0.7  | 1.0 | 0.7 | 0.9  | 1.1 | nt  | 0.9 | 1.0 | 0.8 | 0.9 | 1.1 | 384.0   |
| 69 | 1, 16, 51      | 120.6   | 0.6 | 2.1 | 5.5  | 2.0 | 6.2 | 15.7 | 3.9 | nt  | 2.4 | 1.7 | 1.4 | 1.7 | 8.5 | 612.0   |
| 70 | 13, 14, 52     | 224.6   | 0.7 | 0.7 | 0.7  | 0.6 | 0.6 | 1.3  | 3.0 | nt  | 1.4 | 0.7 | 0.3 | 1.0 | 1.2 | 757.1   |
| 71 | 15, 7, 51, 53  | 81.1    | nt  | 2.0 | 1.7  | 2.0 | 1.0 | nt   | nt  | nt  | 3.5 | 3.9 | 2.7 | 2.8 | nt  | 15.7    |
| 72 | 15, 14, 51, 52 | 206.9   | 0.9 | 1.0 | 5.5  | 1.5 | 1.2 | 1.1  | 1.2 | nt  | 1.7 | 1.0 | 0.9 | 0.9 | 0.7 | 571.2   |
| 73 | 7, 53          | 571.6   | 1.0 | 1.0 | 1.7  | 1.3 | 3.4 | 2.0  | 1.5 | nt  | 1.4 | 1.0 | 1.0 | 0.6 | 0.4 | 194.4   |
| 74 | 15, 17, 52, 51 | 197.3   | 1.7 | 5.6 | 2.0  | 1.8 | 1.4 | 2.1  | 1.1 | 2.7 | 3.0 | 2.3 | 1.9 | 1.2 | 2.0 | 901.3   |

\* negative control      nt - not tested

\*\* positive control -PBMC stimulated with PHA (phytohemagglutinin A)

SI - stimulation index , positive SI ≥ 2.0
