# Supplementary material
Source: PubMed Central journal article supplement (PMC3044955)
Supplement: supp_M110.132118_jbc.M110.132118-2.pdf [file supp_M110.132118_jbc.M110.132118-2.pdf]

## Supplementary Table 2 (S2)

**Positive immune response against StreptInCor overlapping peptides of controls (N=53 out of 90)**

| PepVac identification |                  |         |     |     |     |      |     |     |     |     |     |     |     |     |      |         |
|-----------------------|------------------|---------|-----|-----|-----|------|-----|-----|-----|-----|-----|-----|-----|-----|------|---------|
|                       | HLA-DRB1         | NC* cpm | 10  | 15  | 16  | 17   | 18  | 20  | 21  | 38  | 44  | 48  | 51  | 52  | 53   | PC** SI |
| 1                     | 8, 15, 51        | 128.9   | 0.4 | 2.1 | 1.1 | 1.0  | 1.0 | 0.9 | 0.7 | 1.3 | 1.4 | 1.2 | 0.8 | 0.8 | 0.6  | 315.1   |
| 2                     | 9, 12, 52, 53    | 461.7   | 0.3 | 2.0 | 0.7 | 0.5  | 1.1 | 2.7 | 0.7 | 4.3 | 4.0 | 0.6 | 4.5 | 0.3 | 0.3  | 203.8   |
| 3                     | 17, 13, 52       | 273.5   | 1.1 | 0.9 | 0.7 | 0.8  | 0.8 | 0.9 | 0.9 | nt  | 1.0 | 1.0 | 0.9 | 0.8 | 2.0  | 234.7   |
| 4                     | 15, 10, 51       | 144.3   | 2.1 | nt  | 4.4 | 4.7  | 1.4 | 3.7 | nt  | nt  | nt  | 7.1 | 1.5 | 1.2 | nt   | 437.6   |
| 5                     | 4, 13, 52, 53    | 129.2   | 0.8 | nt  | 1.2 | nt   | 1.4 | 1.3 | nt  | nt  | nt  | 1.7 | 1.1 | 2.7 | 1.4  | 16.2    |
| 6                     | 4, 14, 52, 53    | 516.0   | nt  | 1.4 | 0.8 | nt   | nt  | nt  | nt  | nt  | 2.2 | 1.5 | nt  | nt  | nt   | 46.6    |
| 7                     | 13, 52           | 319.0   | 1.7 | 1.1 | 1.5 | 0.7  | nt  | 2.5 | 1.0 | nt  | 1.2 | 0.8 | 1.6 | 1.7 | nt   | 219.9   |
| 8                     | 1, 17, 52        | 757.1   | 1.5 | nt  | 2.8 | 0.5  | 0.7 | 0.9 | 0.6 | nt  | nt  | 1.0 | 1.0 | 1.0 | 1.1  | 12.3    |
| 9                     | 11, 52           | 577.1   | 0.7 | nt  | 1.5 | 1.0  | 2.4 | 1.5 | 1.3 | nt  | nt  | 0.5 | 3.4 | 3.8 | 1.6  | nt      |
| 10                    | 14, 11, 52       | 78.9    | 3.0 | nt  | 9.8 | nt   | 4.8 | 6.2 | 3.5 | nt  | nt  | 6.3 | 1.7 | nt  | 4.5  | 404.7   |
| 11                    | 14, 52           | 144.1   | 0.9 | 2.4 | 0.7 | 0.7  | 0.6 | 0.8 | 1.1 | 0.9 | 1.0 | 1.0 | 0.9 | 0.9 | 1.0  | 1130.5  |
| 12                    | 7, 8, 53         | 593.6   | 3.0 | 6.3 | 1.2 | 0.7  | 2.1 | 5.6 | 0.6 | 1.2 | 0.3 | 0.8 | 0.6 | 1.4 | 0.4  | 599.3   |
| 13                    | 15, 14.1, 51, 52 | 48.8    | 0.8 | 2.7 | 3.3 | 5.1  | 2.0 | 3.6 | 2.8 | nt  | 4.0 | 4.5 | 5.6 | 3.3 | 4.6  | 220.9   |
| 14                    | 11, 4, 52, 53    | 255.9   | 1.4 | 1.5 | 0.9 | 0.9  | 1.2 | 1.1 | 1.3 | nt  | 9.0 | 8.4 | 5.4 | 2.9 | 1.9  | 264.6   |
| 15                    | 1, 14.1, 52      | 136.6   | 1.1 | 1.5 | 1.7 | 1.4  | 1.5 | 1.3 | 2.5 | nt  | 0.8 | 0.9 | 1.2 | 1.1 | 2.0  | 535.3   |
| 16                    | 16, 17, 51, 52   | 193.6   | nt  | nt  | nt  | nt   | nt  | nt  | nt  | 1.0 | 3.3 | nt  | nt  | nt  | nt   | 221.5   |
| 17                    | 4, 13.1, 52, 53  | 234.3   | 1.6 | 4.5 | 2.4 | 1.5  | 1.3 | 3.5 | 1.7 | nt  | 3.6 | 1.2 | 1.6 | 1.7 | 1.5  | 203.0   |
| 18                    | 7, 8, 53         | 69.2    | 1.6 | 2.0 | 0.8 | 2.2  | 1.0 | 2.5 | 2.1 | 2.0 | 3.0 | nt  | 2.9 | 0.7 | 18.4 | 836.3   |
| 19                    | 17, 11, 52       | 342.7   | 1.2 | 4.7 | 5.6 | 1.8  | 1.7 | 3.0 | 8.5 | nt  | 5.8 | 2.2 | 2.4 | 5.0 | 5.5  | 140.5   |
| 20                    | 13, 14, 52       | 180.2   | 3.8 | 4.3 | 3.1 | 2.5  | 2.9 | 5.8 | 2.7 | nt  | 8.0 | 1.3 | 1.8 | nt  | 4.3  | 559.1   |
| 21                    | 4, 11, 52, 53    | 250.7   | 1.0 | 0.6 | 0.8 | 2.0  | 0.7 | 0.8 | 0.7 | nt  | 0.5 | 0.6 | 0.8 | 0.6 | 0.5  | 24.4    |
| 22                    | 4, 12, 52, 53    | 159.2   | 0.7 | 2.7 | 1.9 | 1.4  | 2.1 | 1.5 | 1.5 | nt  | 1.0 | 1.4 | 1.3 | 0.9 | 1.0  | 330.6   |
| 23                    | 1, 15, 51        | 364.2   | 1.4 | 3.1 | 1.4 | 2.0  | 1.1 | 1.7 | 1.3 | 1.1 | 2.8 | 2.8 | 2.4 | 3.6 | 0.5  | 1028.8  |
| 24                    | 1, 4, 53,        | 132.9   | 1.5 | 1.0 | 1.1 | 0.7  | 0.9 | 1.4 | 1.1 | 0.6 | 1.1 | nt  | 0.8 | 0.7 | 2.1  | 333.1   |
| 25                    | 18?, 17, 52, 52  | 227.2   | 4.1 | 1.0 | 1.1 | 1.8  | 1.1 | 1.1 | 4.0 | nt  | 0.9 | 2.7 | 0.8 | 1.4 | 0.9  | 347.1   |
| 26                    | 15, 4, 51, 53    | 220.7   | 4.4 | 1.6 | 1.4 | 1.8  | 1.7 | 3.3 | 4.5 | nt  | 3.6 | 1.4 | 2.3 | 4.3 | 1.7  | 293.6   |
| 27                    | 4, 13.1, 52, 53  | 136.4   | 1.4 | 2.7 | 1.1 | 1.1  | 4.2 | 3.5 | 1.7 | nt  | 1.7 | 2.5 | 2.1 | 1.2 | 1.2  | 632.3   |
| 28                    | 7, 11, 52, 53    | 190.4   | 1.7 | 1.2 | nt  | 1.0  | 0.7 | nt  | 0.7 | 0.8 | 1.2 | 0.7 | 0.6 | 0.6 | 6.3  | 291.6   |
| 29                    | 7, 53            | 245.3   | 0.9 | 1.2 | 0.8 | 1.2  | 0.9 | 1.1 | 1.1 | nt  | 1.7 | 2.0 | 0.8 | 0.1 | 0.1  | 243.6   |
| 30                    | 15, 4, 52, 53    | 151.1   | 0.9 | 1.2 | 1.1 | 1.0  | 1.1 | 1.2 | 2.7 | nt  | 0.9 | 0.9 | 1.0 | 0.8 | 1.0  | 539.5   |
| 31                    | 1, 13.1, 52      | 178.9   | 1.1 | 1.3 | 1.0 | 0.7  | 0.9 | 1.1 | 1.7 | nt  | 1.2 | 0.8 | 1.0 | 1.3 | 2.0  | 354.9   |
| 32                    | 17, 7, 52, 53    | 227.7   | 2.3 | 2.0 | 1.1 | 0.6  | 0.7 | 0.8 | 0.5 | 1.0 | 0.9 | 0.9 | 0.7 | 0.7 | 1.1  | 133.2   |
| 33                    | 15, 17, 51, 52   | 230.2   | 3.1 | 3.6 | 5.8 | 4.2  | 2.9 | 6.3 | 4.4 | nt  | 6.2 | nt  | 1.1 | nt  | 1.7  | 343.4   |
| 34                    | 15, 13.1, 51, 52 | 174.6   | 1.4 | 1.3 | 0.7 | 1.1  | 0.8 | 0.9 | 0.8 | nt  | 2.1 | 0.8 | 2.0 | 1.1 | 1.0  | 177.4   |
| 35                    | 13, 9, 52, 3     | 173.5   | 3.5 | 3.7 | 2.4 | 3.3  | 2.8 | 2.8 | 2.9 | nt  | 5.9 | 1.4 | 1.8 | 1.2 | 2.4  | 351.4   |
| 36                    | 4, 13, 52, 53    | 400.7   | 0.9 | 2.0 | nt  | 0.8  | 2.1 | 2.0 | 0.7 | 1.5 | 2.0 | 0.7 | 1.1 | 0.8 | 0.7  | 17.6    |
| 37                    | 4, 11, 53, 52    | 6147.4  | 0.6 | 2.0 | nt  | 0.5  | 2.0 | nt  | 0.8 | nt  | 2.4 | 0.6 | 2.5 | 0.7 | 3.2  | 28.5    |
| 38                    | 15, 14, 51, 52   | 201.1   | 0.8 | 2.4 | nt  | 0.8  | 0.9 | nt  | 0.5 | nt  | 0.9 | 2.1 | 1.2 | 0.8 | 8.3  | 615.5   |
| 39                    | 16, 7, 51, 53    | 294.0   | 2.9 | 0.9 | 0.6 | 0.7  | 0.7 | 0.8 | 0.7 | nt  | 0.7 | 0.7 | 0.5 | 0.9 | 0.7  | 196.1   |
| 40                    | 15, 7, 51, 53    | 135.9   | 1.3 | 2.1 | 1.1 | 1.7  | 1.4 | 1.7 | 1.5 | nt  | 1.1 | 1.2 | 1.2 | 1.2 | 0.9  | 320.9   |
| 41                    | 17, 11, 52       | 158.2   | 1.0 | 3.5 | 3.0 | 11.3 | 0.8 | 2.1 | 2.9 | 3.9 | 5.3 | 4.6 | 9.0 | 5.1 | 8.0  | 701.2   |
| 42                    | 13, 7, 52, 53    | 209.0   | 2.3 | 1.0 | 0.3 | 0.9  | 1.1 | 0.9 | 1.0 | 1.0 | 2.0 | nt  | 1.0 | 0.7 | 0.9  | 154.7   |
| 43                    | 8, 4, 53         | 114.1   | 0.8 | 1.9 | 1.1 | 1.0  | 1.0 | 1.3 | 2.4 | nt  | 1.9 | 2.2 | 1.5 | 1.2 | 1.7  | 843.2   |
| 44                    | 9, 53            | 114.5   | 1.1 | 1.8 | nt  | 1.1  | 0.9 | nt  | 0.9 | nt  | 1.6 | 1.1 | 1.6 | 1.1 | 9.3  | 596.2   |
| 45                    | 1, 7, 53, 0      | 161     | 1.2 | 1.4 | 1.2 | 1.7  | 2.1 | 2.5 | 1.8 | nt  | 2.7 | 1.3 | 0.9 | 1.0 | 1.3  | 402.8   |
| 46                    | 4, 10, 53        | 215.5   | 1.0 | 0.8 | 0.9 | 0.7  | 1.0 | 1.1 | 2.5 | nt  | 1.1 | 1.4 | 1.1 | 0.8 | 1.8  | 417.6   |
| 47                    | 13, 2, 14.1, 52  | 240.1   | 0.9 | 7.0 | 0.6 | 16.4 | 0.6 | 0.8 | 1.2 | nt  | 0.6 | 0.6 | 0.5 | 0.3 | 0.7  | 406.5   |
| 48                    | 15, 9, 51, 53    | 148.3   | nt  | 2.4 | nt  | 2.8  | nt  | 2.2 | 3.1 | nt  | 2.4 | nt  | nt  | nt  | nt   | 477.7   |
| 49                    | 7, 10, 53        | 232.0   | 1.7 | 2.5 | 1.1 | nt   | 2.7 | 0.9 | 1.4 | nt  | 1.0 | 1.0 | 0.7 | 0.6 | 0.6  | 524.9   |
| 50                    | 13.1, 8, 52      | 312.5   | 1.1 | 0.9 | 1.9 | 0.7  | 0.7 | 1.8 | 0.6 | 1.1 | 1.1 | 3.4 | 0.5 | 0.3 | 0.5  | 103.0   |
| 51                    | 17, 52           | 65.9    | 1.0 | 4.3 | 3.5 | 3.3  | 3.1 | 4.0 | 3.0 | nt  | 3.9 | 2.9 | 2.9 | 4.1 | 2.1  | 427.5   |
| 52                    | 11, 13, 52       | 185.7   | 0.9 | 2.0 | 1.7 | 1.9  | 1.3 | 1.6 | 1.7 | nt  | 1.1 | 1.5 | 1.6 | 1.2 | 1.4  | 365.7   |
| 53                    | 17, 7, 52, 53    | 180.2   | 2.2 | 2.2 | 2.6 | 1.6  | 0.9 | 0.9 | 1.7 | 2.0 | 2.0 | 4.0 | 1.6 | 1.2 | 4.3  | 967.3   |

\* negative control                      nt - not tested

\*\* positive control -PBMC stimulated with PHA (phytohemagglutinin A)

SI - stimulation index , positive SI <sup>3</sup> 2.0
